# Supplementary material
Source: Springer Nature journal article supplement (https://www.springermedizin.de/resource/supplementary/12889_2008_1456_MOESM1_ESM.pdf/9504320)
Supplement: MOESM1 [file 9504320]

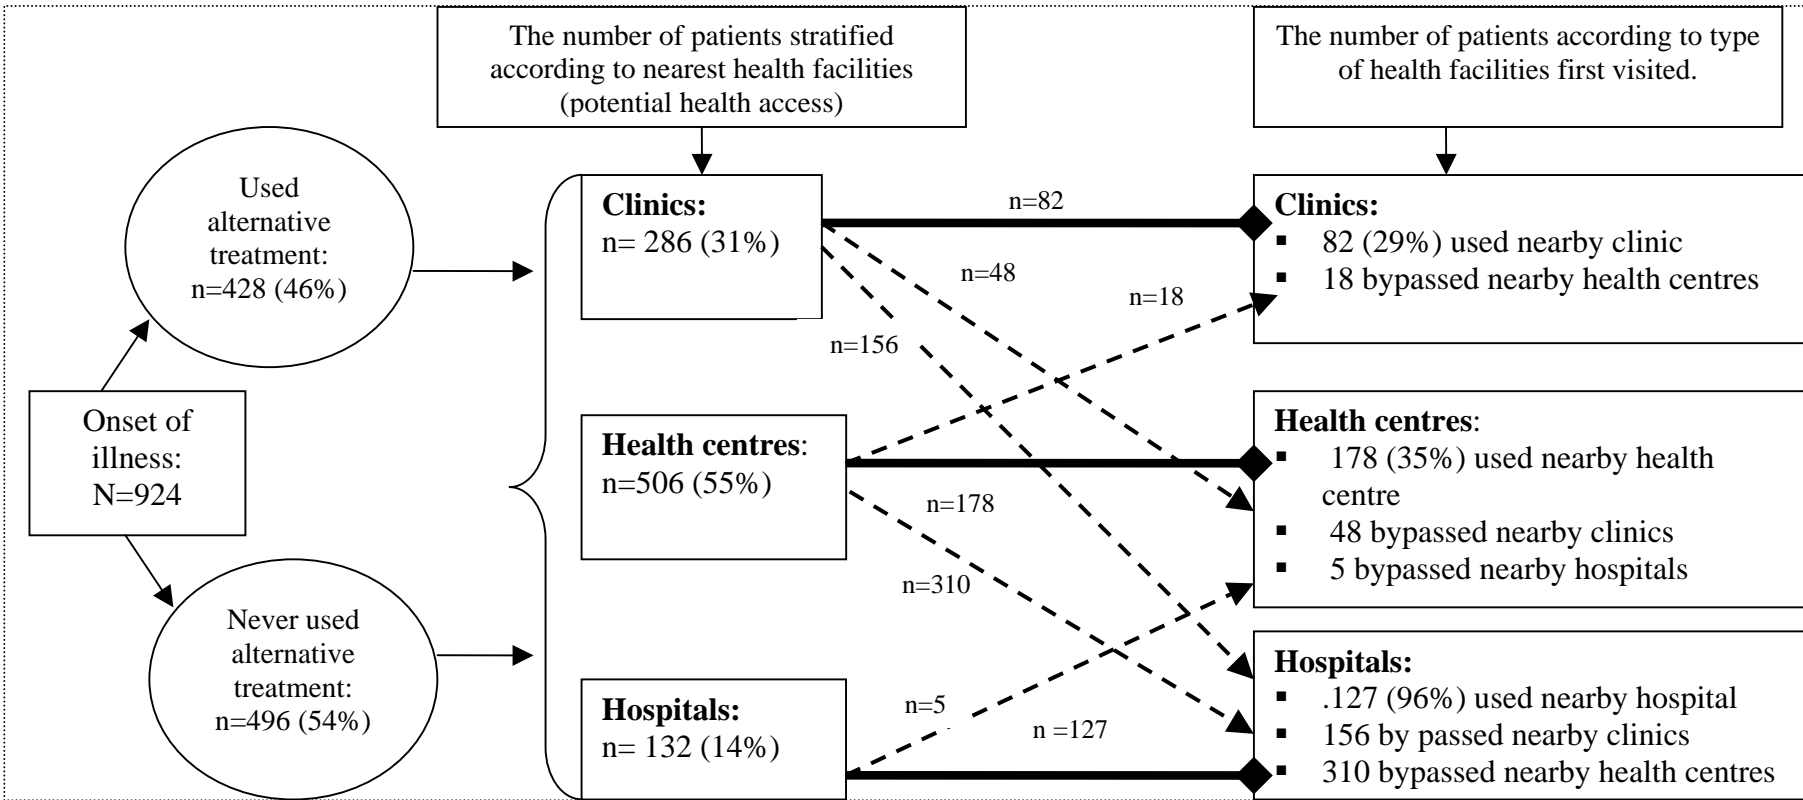

—◆ Shows patients' use of nearby health facilities

- -► Shows patients' first visit at distant health facilities bypassing the nearby one.
